# Supplementary material for: Titanosaur Osteoderms from the Upper Cretaceous of Lo Hueco (Spain) and Their Implications on the Armor of Laurasian Titanosaurs
Source: PLoS One. 2014 Aug 13;9(8):e102488. doi: 10.1371/journal.pone.0102488 (PMC4131861; doi:10.1371/journal.pone.0102488)
Supplement: Table S1 — Cartesian coordinates obtained for the osteoderm outlines employed in the elliptic Fourier analysis. (XLSX) [file pone.0102488.s001.xlsx]

## Sheet: Sheet1
	X1	Y1	X2	Y2	X3	Y3	X4	Y4	X5	Y5	X6	Y6	X7	Y7	X8	Y8	X9	Y9	X10	Y10	X11	Y11	X12	Y12	X13	Y13	X14	Y14	X15	Y15	X16	Y16	X17	Y17	X18	Y18	X19	Y19	X20	Y20	X21	Y21	X22	Y22	X23	Y23	X24	Y24	X25
Cru1	89	435	76	411	58	387	44	365	39	340	31	317	29	294	26	274	27	254	23	230	27	206	35	183	43	159	63	143	75	127	80	102	98	86	119	73	141	55	163	44	188	34	212	28	235	25	258	21	281
Cru2	24	349	16	324	15	300	13	275	14	254	5	229	8	205	14	180	29	157	52	143	72	124	88	105	110	93	134	86	156	73	174	57	197	49	221	40	246	24	272	24	298	25	323	22	349	18	373	21	398
HUE00950	25	239	16	218	21	197	20	177	27	156	45	136	57	115	74	97	94	80	114	69	135	65	156	63	176	56	197	52	218	47	239	42	259	42	280	44	301	45	322	41	342	42	356	53	377	55	398	54	419
HUE00913	8	372	14	348	15	324	17	300	14	276	23	253	37	231	54	207	75	183	85	160	104	137	126	117	150	106	174	96	197	87	219	76	243	68	267	62	282	40	306	32	330	28	354	28	378	30	401	27	425
HUE561	90	603	88	578	84	550	74	523	67	495	48	469	24	442	24	415	21	387	17	360	19	334	23	306	34	281	43	253	50	226	53	198	69	171	82	144	106	120	133	112	159	95	180	71	206	56	233	52	260
HUE590	12	418	10	390	8	364	9	336	9	309	17	283	17	257	19	229	35	206	53	180	75	162	88	148	108	128	132	104	154	84	178	76	197	64	224	54	249	47	265	36	289	25	316	22	344	19	371	23	397
HUE1330	20	266	13	244	27	225	42	207	49	187	54	165	77	153	99	145	121	148	140	141	159	137	151	115	173	105	192	92	214	97	228	81	249	71	269	66	290	64	312	59	334	57	357	61	379	61	398	71	421
HUE2000	18	179	13	157	6	135	10	113	20	97	34	81	52	64	69	50	90	37	112	25	134	14	156	14	178	13	201	11	221	10	242	9	263	18	284	10	306	11	328	10	350	18	369	10	390	19	412	12	434
HUE2326	17	271	15	246	19	222	16	197	31	173	36	149	50	125	55	102	69	80	93	68	111	49	136	33	159	30	183	17	207	23	230	25	255	23	280	18	305	19	329	22	354	21	379	17	403	20	427	10	452
FGGUB R. 1410	44	417	37	393	22	371	22	346	11	323	15	298	13	272	13	247	15	222	24	196	25	173	39	150	58	125	82	103	104	87	128	67	154	62	174	47	197	37	221	33	246	34	271	28	296	14	322	13	347
Mal 204	22	310	17	290	12	269	12	246	18	224	23	201	35	178	55	160	72	140	89	123	108	111	130	94	150	79	172	67	194	54	211	41	234	32	256	28	279	25	302	23	324	25	347	25	370	28	392	27	415
MDE136	26	459	21	433	17	407	16	381	17	356	19	331	20	305	29	281	37	255	51	230	70	208	86	183	104	161	129	143	155	135	181	125	200	104	220	91	245	84	263	69	281	52	307	43	332	33	355	23	381
MDE192	14	345	9	320	9	294	21	267	29	240	42	215	49	190	63	173	89	167	104	147	120	129	146	129	172	120	188	103	212	95	218	98	240	89	259	98	287	96	313	84	340	72	355	49	374	29	400	23	427
MDE325	19	354	6	330	8	305	15	282	20	259	26	237	39	212	55	191	78	176	92	166	112	151	130	130	148	113	167	94	186	81	205	60	219	57	243	57	267	56	292	48	316	38	340	28	364	26	389	22	410
CM436	115	641	101	613	87	591	77	565	68	537	43	525	39	515	24	490	10	464	11	438	11	410	15	381	18	353	27	325	45	297	50	269	53	243	66	217	69	190	74	167	90	144	111	117	134	104	159	90	183
PDG	50	366	42	343	36	321	31	298	29	275	29	253	30	230	28	207	27	185	39	168	46	145	52	123	63	102	80	79	97	59	120	44	143	33	165	24	188	12	211	15	233	12	256	11	279	19	301	22	324
CNRST-SUNY-197	71	497	52	474	37	450	28	425	13	401	7	376	5	351	3	327	2	302	9	278	18	253	28	230	44	205	59	180	77	157	93	132	115	111	140	95	163	77	187	67	212	56	236	44	261	30	285	19	310
FMNH 2342	120	471	100	450	81	427	74	402	61	380	54	356	47	332	39	308	20	293	10	269	9	245	10	221	8	197	9	173	14	150	30	130	47	112	52	88	72	69	94	58	114	43	139	39	163	33	186	26	209
[truncated: 151 more columns]
